# Supplementary material for: Differential regulation of triterpene biosynthesis induced by an early failure in cuticle formation in apple
Source: PubMed Central journal article supplement (PMC8012369; doi:10.1038/s41438-021-00511-4), 2021-04-01

Flavonoid biosynthesis

Phenylpropanoid biosynthesis

Cutin, suberin, wax biosynthesis

Terpenoid backbone biosynthesis

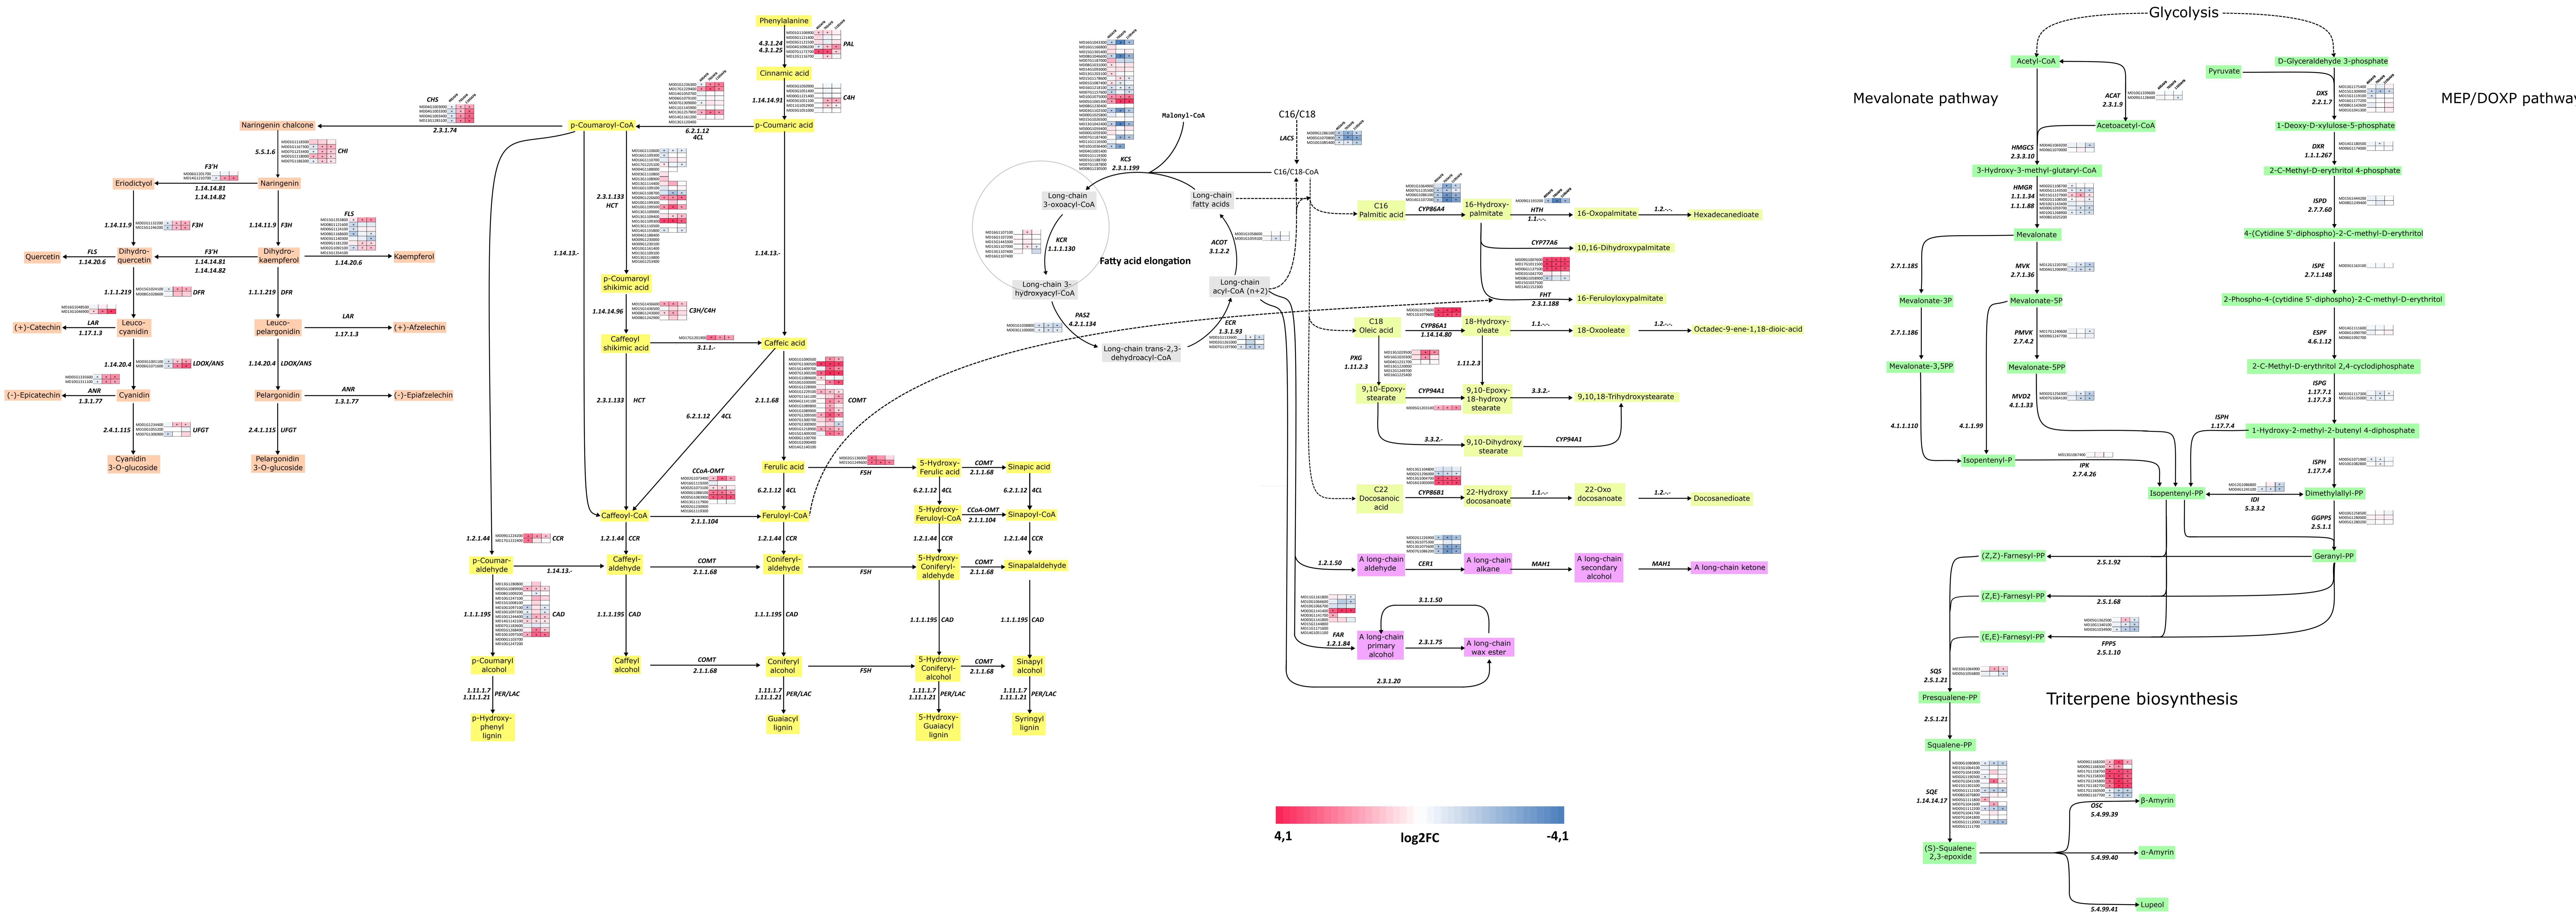

Supplement: 41438_2021_511_MOESM2_ESM.pdf [file 41438_2021_511_MOESM2_ESM.pdf]
