# Supplementary material for: Differential regulation of triterpene biosynthesis induced by an early failure in cuticle formation in apple
Source: PubMed Central journal article supplement (PMC8012369; doi:10.1038/s41438-021-00511-4), 2021-04-01
Supplement: 41438_2021_511_MOESM3_ESM.pdf [file 41438_2021_511_MOESM3_ESM.pdf]

**ABA biosynthesis**

|              | 40DAA | 76DAA | 110DAA |
|--------------|-------|-------|--------|
| MD07G1011500 |       | *     |        |
| MD10G1194200 | *     | *     |        |
| MD10G1261000 |       |       |        |
| MD13G1090300 | *     |       |        |
| MD14G1105700 | *     | *     | *      |
| MD16G1090700 | *     | *     |        |
| MD02G1309500 |       |       |        |
| MD02G1309600 |       |       |        |
| MD02G1309700 |       |       |        |
| MD13G1090100 |       |       |        |
| MD13G1090200 |       |       |        |

(9-CIS-EPOXYCAROTENOID DIOXYGENASE) *NCED*

**ABA-insensitive-like proteins**

|              |  |  |  |
|--------------|--|--|--|
| MD02G1043600 |  |  |  |
| MD07G1129600 |  |  |  |
| MD15G1182100 |  |  |  |
| MD01G1073200 |  |  |  |

*ABI-1 and ABI-2*

*ABA RECEPTORS*

*PP2C*

*SNF-1 RELATED PROTEIN KINASES*

**ABA receptors proteins**

|              |   |   |   |
|--------------|---|---|---|
| MD01G1078900 |   |   |   |
| MD01G1216100 |   |   |   |
| MD03G1292500 | * | * | * |
| MD06G1034000 |   |   |   |
| MD07G1147700 |   |   |   |
| MD07G1286000 |   |   |   |
| MD13G1160700 | * | * | * |
| MD13G1160900 | * |   | * |
| MD13G1161700 |   | * | * |
| MD16G1160100 |   |   | * |

**TYPE 2C PROTEIN PHOSPHATASES (PP2Cs)**

|              |   |   |   |
|--------------|---|---|---|
| MD01G1139200 | * | * | * |
| MD03G1085400 |   |   |   |
| MD07G1203700 |   |   |   |
| MD07G1291000 | * | * | * |
| MD11G1093100 | * |   | * |
| MD13G1061100 |   |   |   |
| MD01G1220800 | * | * | * |

**SNF1-RELATED PROTEIN KINASES**

|              |   |   |   |
|--------------|---|---|---|
| MD01G1035000 | * |   | * |
| MD02G1166500 | * | * | * |
| MD04G1054400 | * | * | * |
| MD08G1187200 | * | * | * |
| MD08G1236500 |   |   |   |
| MD10G1088700 |   |   |   |
| MD15G1279000 | * | * |   |
| MD15G1321000 | * |   |   |
| MD15G1373000 |   |   |   |
| MD15G1428500 |   |   | * |
| MD17G1275100 |   |   |   |

Drought and other stress factors

Abscisic acid (ABA)

Signalling pathways

Signalling pathways

ABA-responsive element-binding factors

ABA-responsive genes

*KIN2*  
*RD29*  
*RD22*  
*RAB DEHYDRINS*

**Drought-related and ABA responsive**

|              |   |   |   |
|--------------|---|---|---|
| MD02G1139700 | * |   |   |
| MD02G1139900 | * | * |   |
| MD02G1140000 | * | * | * |
| MD02G1140100 | * | * | * |

**Known ABA-responsive genes**

|              |   |   |   |
|--------------|---|---|---|
| MD15G1219500 | * | * | * |
| MD15G1098800 | * | * | * |
| MD07G1268800 | * | * | * |
| MD09G1079600 | * | * | * |

**ABA responsive elements-binding factor**

|              |  |  |   |
|--------------|--|--|---|
| MD03G1264200 |  |  |   |
| MD05G1082000 |  |  | * |
| MD08G1099600 |  |  | * |
| MD13G1188000 |  |  |   |
| MD14G1021600 |  |  |   |
| MD15G1081800 |  |  | * |
| MD16G1188600 |  |  |   |

ABA-independent transcription factors

ABA-induced transcription factors

*MYB16/106*

*MYB15?*

*MYB17*

*MdSHN3*

*HDG1*

*MYB30*

*MYB94*

*MYB96*

*MYB41*

*MYB107/MYB9*

*NAC46*

*MYB39*

*MdMYB93*

**Cutin Synthesis genes**

**Wax Synthesis genes**

**Suberin Synthesis genes**

**ABA induced TF**

**Cutin**

|              |   |   |   |
|--------------|---|---|---|
| MD15G1124900 | * | * | * |
| MD09G1051000 |   | * |   |
| MD07G1127600 | * | * | * |
| MD07G1266200 | * | * | * |
| MD01G1050200 | * |   |   |
| MD01G1198100 |   | * | * |
| MD16G1218000 |   | * |   |
| MD16G1218900 |   | * |   |
| MD17G1086700 |   | * |   |
| MD04G1229300 |   |   | * |
| MD05G1197600 |   |   | * |
| MD09G1098600 | * | * | * |
| MD10G1305700 | * | * | * |

**ABA induced TF**

**Wax**

|              |   |   |   |
|--------------|---|---|---|
| MD17G1050900 | * | * | * |
| MD06G1192900 | * | * | * |
| MD14G1200100 | * | * | * |
| MD09G1054000 | * | * | * |
| MD01G1054800 | * | * | * |
| MD17G1051700 | * | * | * |

**Putative suberin and ABA-related genes**

|              |   |   |   |
|--------------|---|---|---|
| MD15G1204700 | * | * | * |
| MD09G1183800 | * | * | * |
| MD13G1026400 | * | * | * |
| MD10G1124100 | * | * | * |
| MD02G1191000 | * | * | * |
| MD16G1010100 | * | * | * |
| MD13G1013200 | * | * | * |
| MD02G1076300 | * | * | * |
| MD10G1304600 | * | * | * |
| MD05G1239200 | * | * | * |
| MD04G1092400 | * | * | * |
| MD05G1011100 | * | * | * |
| MD10G1010900 | * | * | * |

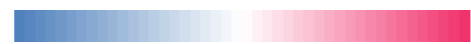

-4.3

log2FC

4.3
